# Supplementary material for: Super-resolution microscopy reveals ultra-low CD19 expression on myeloma cells that triggers elimination by CD19 CAR-T
Source: PubMed Central journal article supplement (PMC6637169; doi:10.1038/s41467-019-10948-w), 2019-07-17
Supplement: 41467_2019_10948_MOESM1_ESM.pdf [file 41467_2019_10948_MOESM1_ESM.pdf]

**Super-resolution microscopy reveals ultra-low CD19 expression on myeloma cells  
that triggers elimination by CD19 CAR-T**

Nerreter et al

**SUPPLEMENTARY INFORMATION**

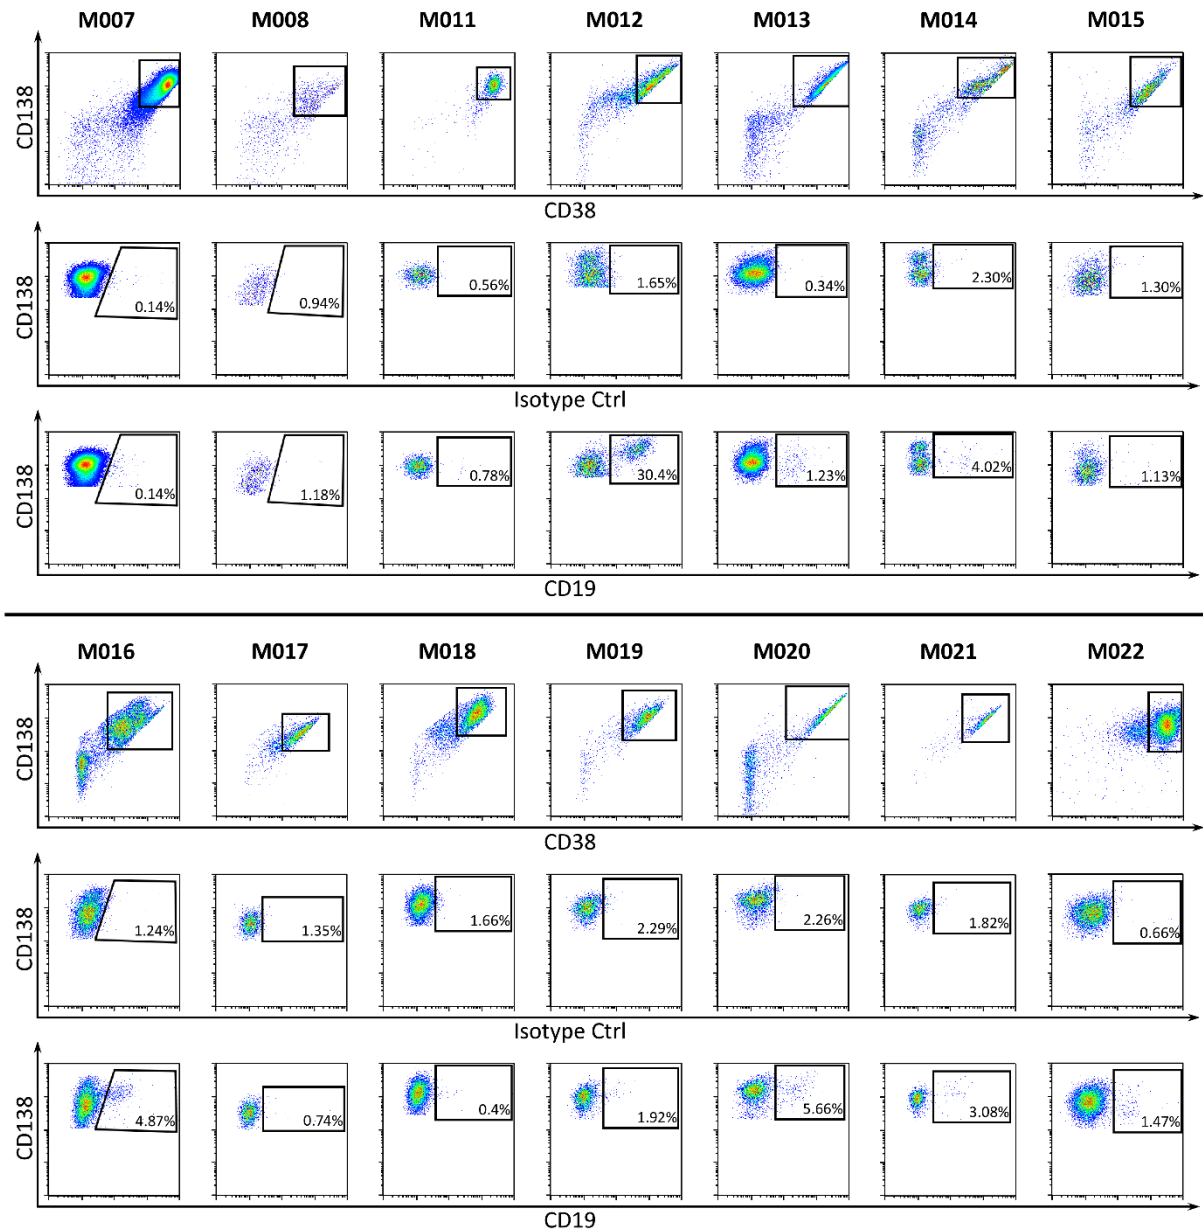

**Supplementary Figure 1. Detection of CD19 on myeloma cells by flow cytometry.** CD138-purified bone marrow aspirates from multiple myeloma patients were stained with antibodies against CD138 and CD38 to detect myeloma cells (first line) and a CD19-specific antibody (third line) or a corresponding isotype control (second line) and measured by flow cytometry. Gates were set on plasma cells (FSC/SSC), 7-AAD<sup>-</sup> and CD138<sup>+</sup>/CD38<sup>+</sup> myeloma cells. Percentages indicated refer to CD19-positive cells within the CD138<sup>+</sup>/CD38<sup>+</sup> subset.

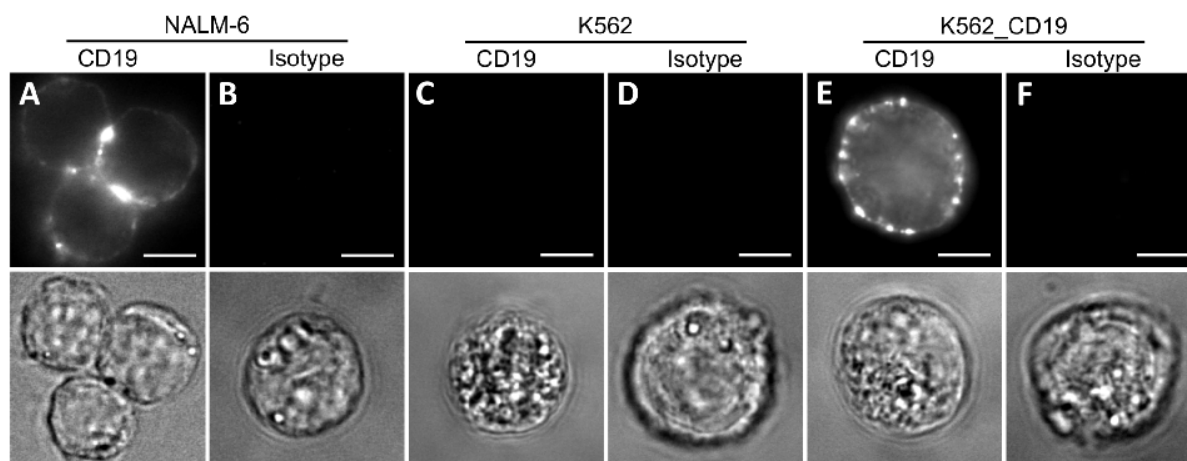

**Supplementary Figure 2. Specificity of anti-CD19 antibody.** The anti-CD19 antibody employed in this study was tested for binding specificity by conventional wide-field microscopy (*upper rows*: normalized fluorescence, *bottom rows*: transmitted light). NALM-6 (**A, B**), K562 (**C, D**) and CD19 expressing K562\_CD19 cells (**E, F**) were stained with anti-CD19-AF647 antibody (*column label*: CD19) and its corresponding isotype-AF647 antibody (*column label*: Isotype). Scale bars, 7  $\mu$ m.

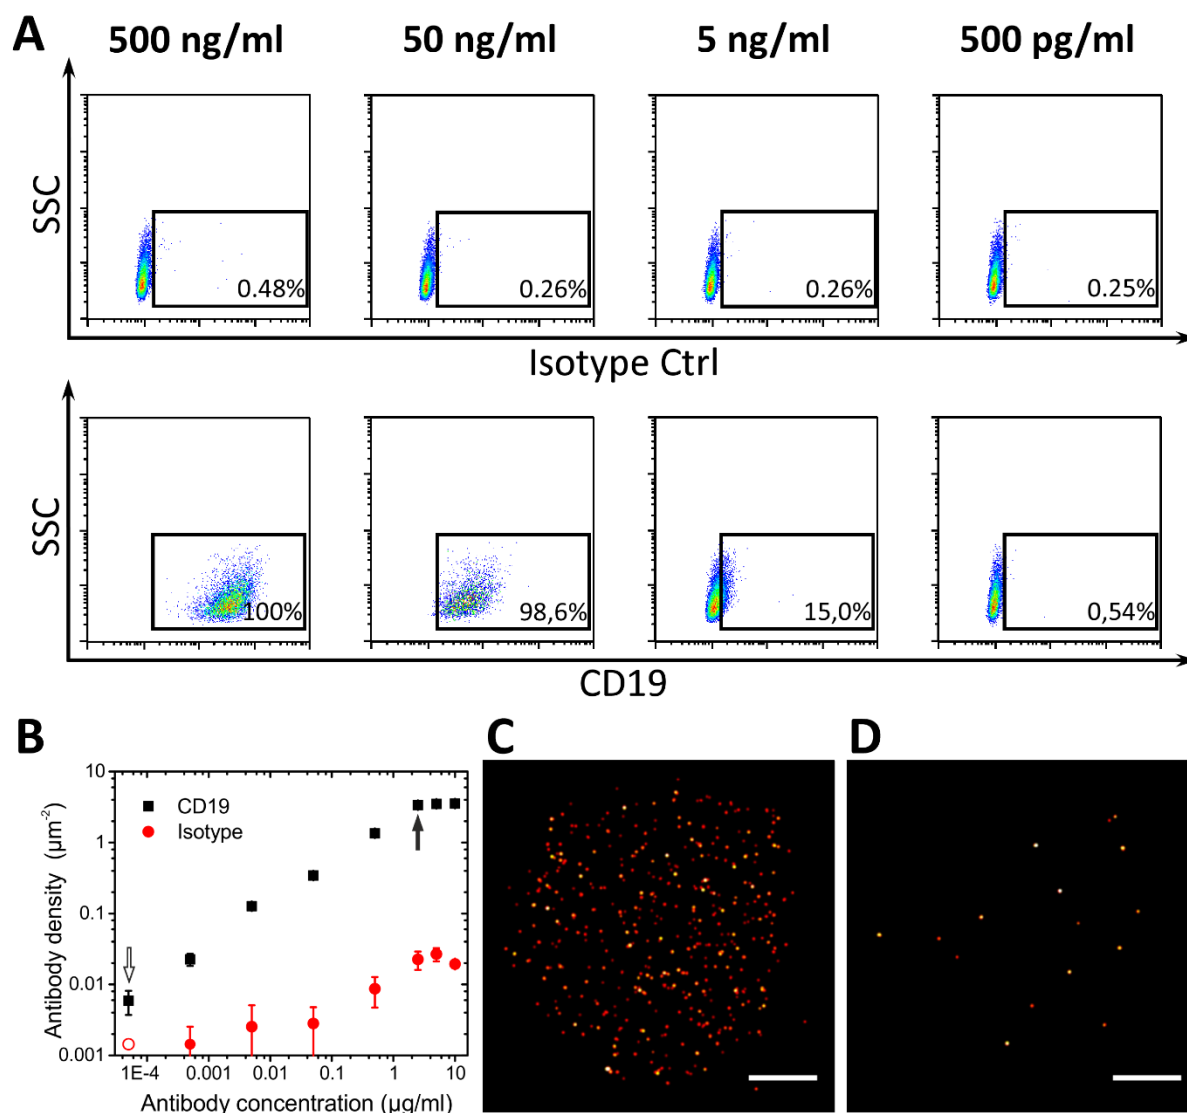

**Supplementary Figure 3. *d*STORM is 1000-times more sensitive than flow cytometry in detecting CD19.** The CD38<sup>+</sup>/CD138<sup>+</sup>/CD19<sup>+</sup> ALL cell line NALM-6 was stained with antibodies against CD138, CD38 and CD19 or the corresponding isotype control. (A) Flow cytometric detection of CD19 on NALM-6 cells with decreasing dilutions of CD19-specific antibody (lower row) or corresponding isotype control (upper row). (B) Detection of CD19 antibody (black squares) and isotype control (red circles) by *d*STORM. At a CD19 antibody concentration of 2.5  $\mu\text{g/ml}$  (1:20 dilution), the CD19 density saturated at  $3.4 \pm 0.2$  (SEM, Standard Error of the Mean) CD19 antibodies/ $\mu\text{m}^2$  (filled arrow). The lowest detectable density was  $0.006 \pm 0.002$  CD19 antibodies/ $\mu\text{m}^2$ , which was at 50 pg/ml (1:10<sup>6</sup> dilution, open arrow). At an isotype antibody concentration of 50 pg/ml, it was not possible to detect any molecules (0 molecules/ $\mu\text{m}^2$ ), which is represented as a red open circle in the graph. Corresponding *d*STORM images are depicted in (C), 2.5  $\mu\text{g/ml}$ , and (D), 50 pg/ml CD19 antibody. Scale bars, 2  $\mu\text{m}$ .

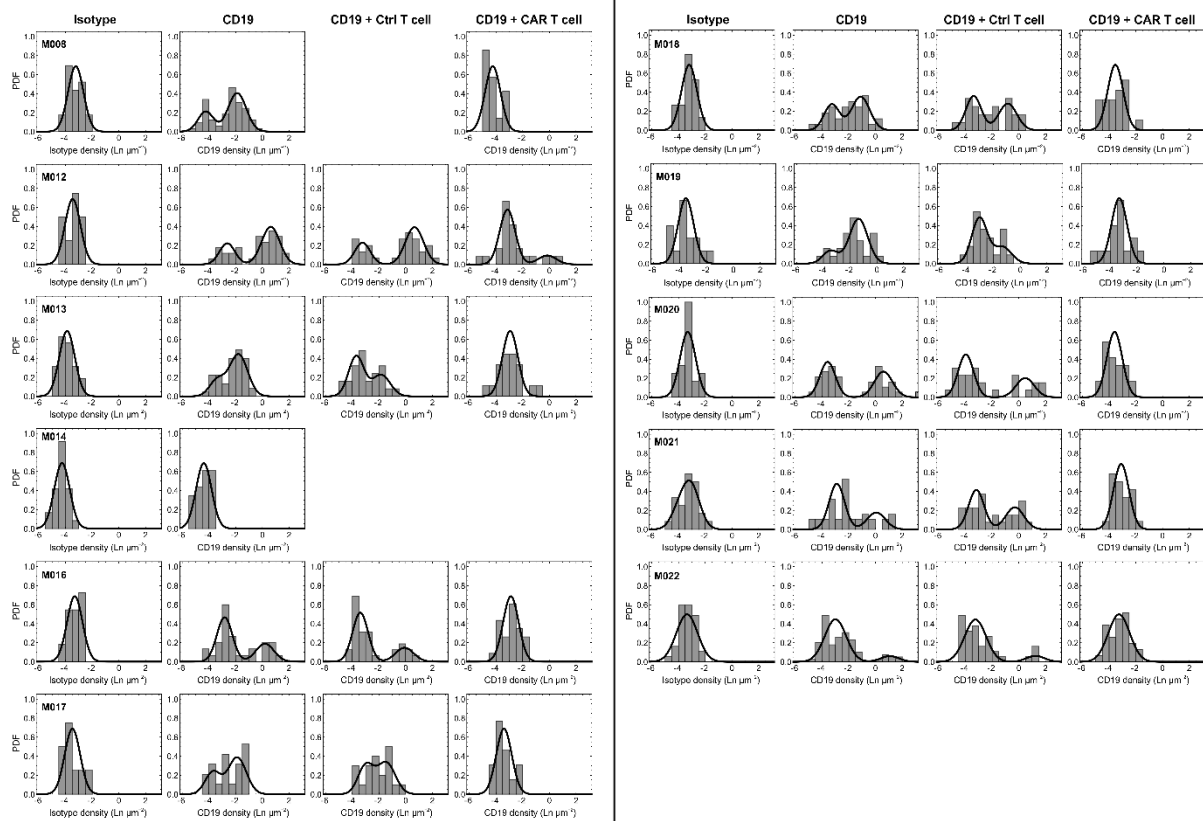

**Supplementary Figure 4. Quantification of CD19 on myeloma cells by *d*STORM and elimination of CD19-positive myeloma cells by CD19 CAR-T.** CD138-purified bone marrow aspirates from multiple myeloma patients were stained with antibodies against CD138 and CD38 to detect myeloma cells and a CD19-specific antibody or corresponding isotype control as indicated. Shown are distributions of all CD19-positive patients and one representative negative patient (M014). Left panels: Logarithmic number (natural logarithm, Ln) of isotype and CD19 antibodies per  $\mu\text{m}^2$  of untreated myeloma cells. Right panels: Logarithmic CD19 densities of control T-cell- and CAR-T-cell-treated myeloma cells. Density distributions were subsequently divided into a CD19-positive subpopulation (CD19-positive cells) and a CD19-negative subpopulation (CD19-negative cells). The latter group was defined by the density distribution pattern of the isotype control antibody (non-specific binding of the control antibody to the plasma membrane and glass surface). Distributions were fitted with a one or two component log-normal function that was dependent on the fit accuracy calculated with an Anderson-Darling test (rejected at a p-value  $< 0.05$ ). Effect of control T-cells was not evaluated for patient M008. M014 is an example of a completely CD19<sup>-</sup> patient. PDF: probability density function. Data are also summarized in Table 1.

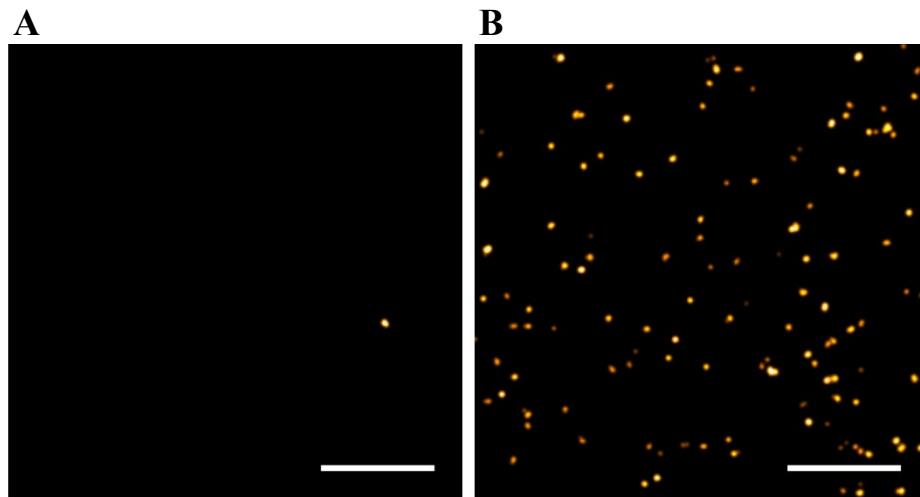

**Supplementary Figure 5. CD19<sup>low</sup> and CD19<sup>high</sup> expression on primary myeloma cells.** 4×4 μm sections of reconstructed *d*STORM images showing single CD19 molecules on the basal plasma membrane of immobilized multiple myeloma cells. (A) Low CD19 expression (~ 13 molecules/cell, M017) and (B) high CD19 expression (~ 3,000 molecules/cell, M022). Scale bars, 1 μm.

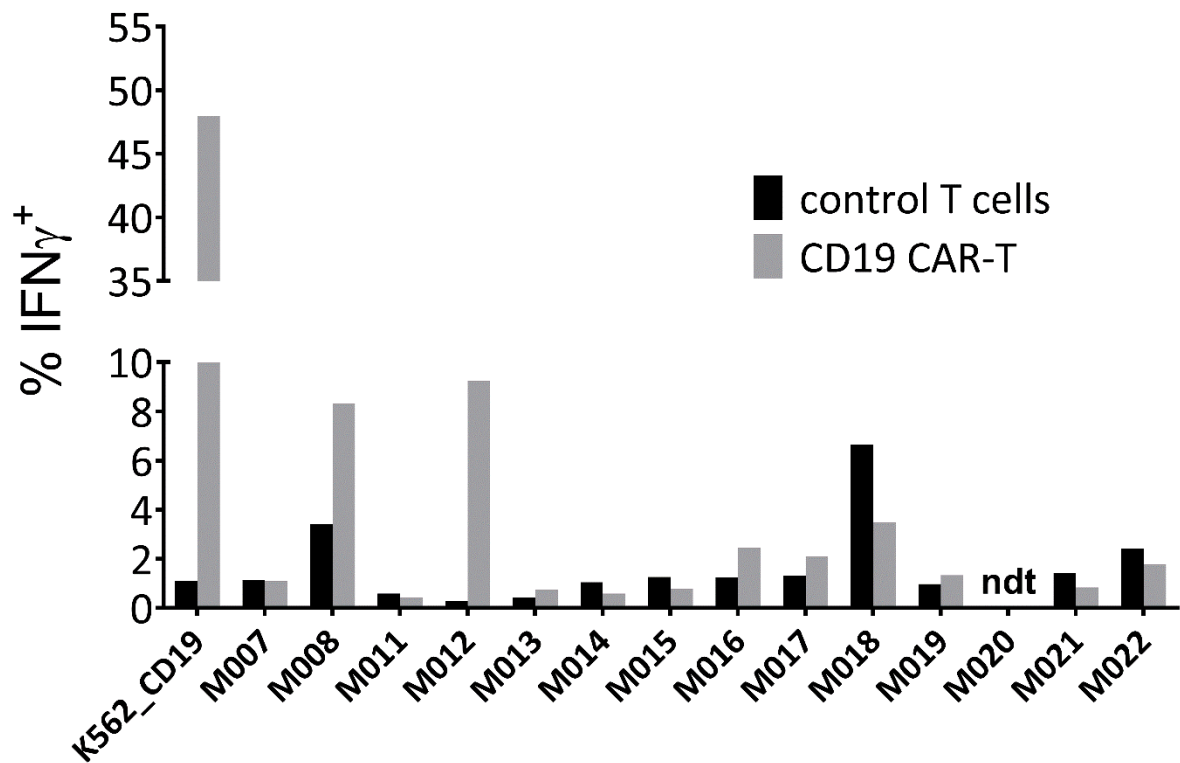

**Supplementary Figure 6. IFN $\gamma$  production by CD19 CAR-T upon coculture with myeloma cells.** CD19 CAR-T (light gray) or untransduced control CD8<sup>+</sup> T-cells (black) were cocultured with primary myeloma cells or K562\_CD19 at an effector:target ratio of 4:1 for 4 h in the presence of GolgiStop<sup>™</sup>. T-cells were treated with Cytotfix/Cytoperm and stained with anti-CD8 and anti-IFN $\gamma$  mAbs. Shown is the percentage of IFN $\gamma$ <sup>+</sup> T-cells in the presence of primary myeloma or K562\_CD19 cells minus the percentage of IFN $\gamma$ <sup>+</sup> T-cells cultured for 4 h with medium only. Gates were set on lymphocytes (FSC/SSC), CD8<sup>+</sup> and IFN $\gamma$ <sup>+</sup> cells. Every column represents a single experiment, except for K562\_CD19 (n=12). ndt: cytokine production was not assessed for patient M020.

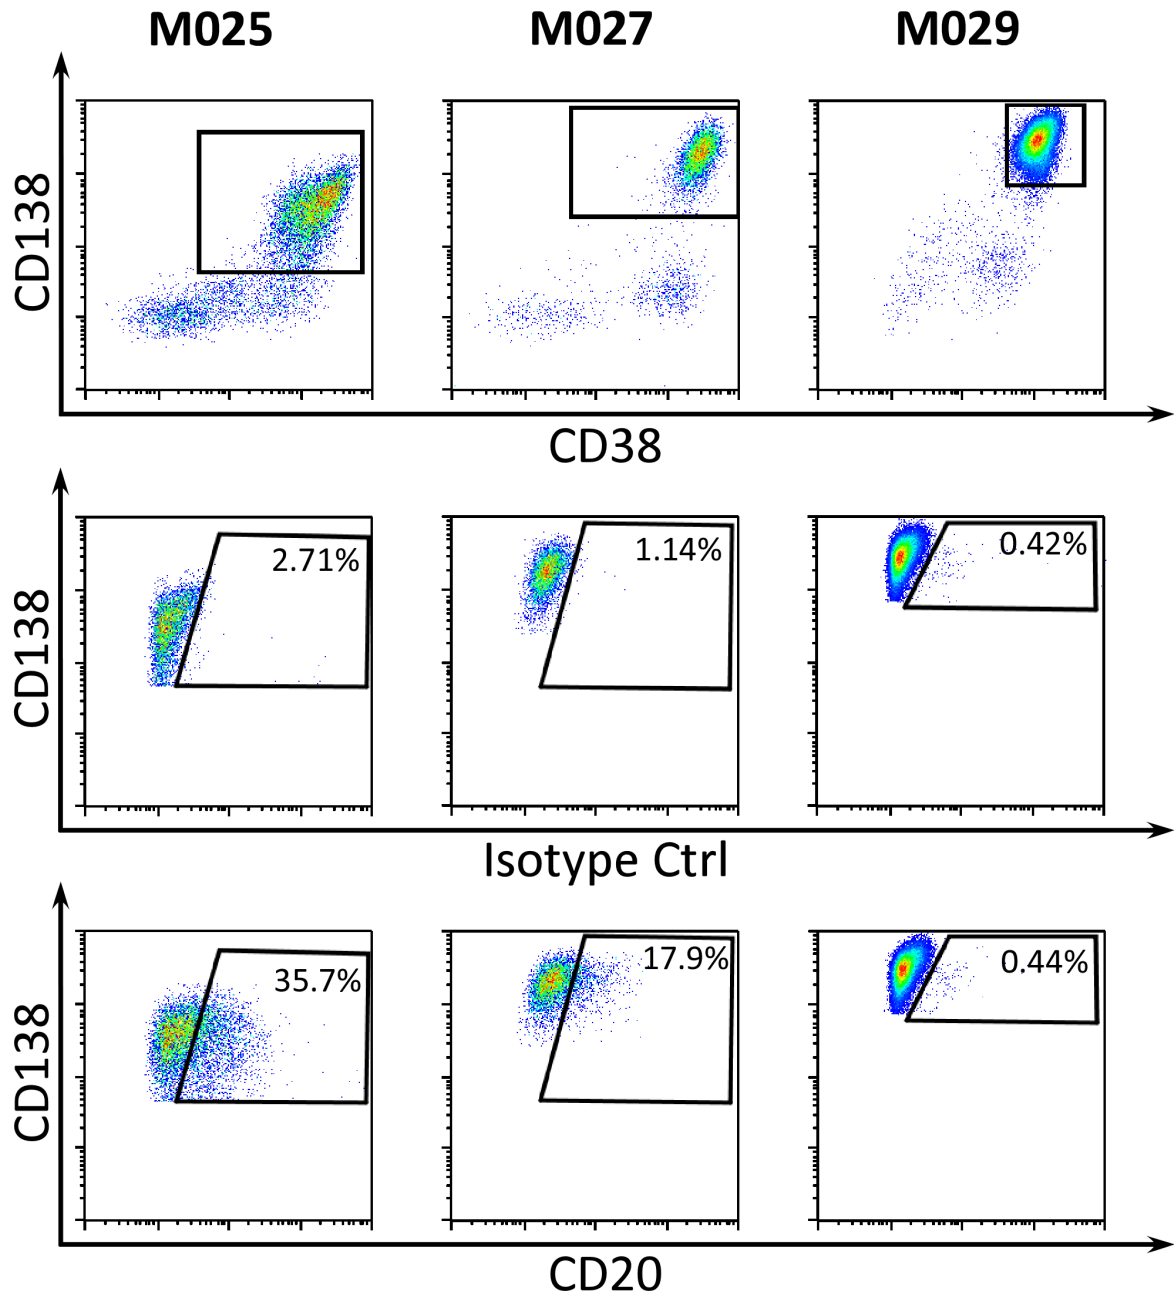

**Supplementary Figure 7. Detection of CD20 on myeloma cells by flow cytometry.** Flow cytometric analysis of CD20-expression on primary myeloma cells purified from bone marrow aspirates. Gating strategy for dot plots shown: FSC/SSC plasma cell gate  $\rightarrow$  7-AAD<sup>-</sup>  $\rightarrow$  CD138<sup>+</sup>/CD38<sup>+</sup>  $\rightarrow$  Isotype control or CD20.



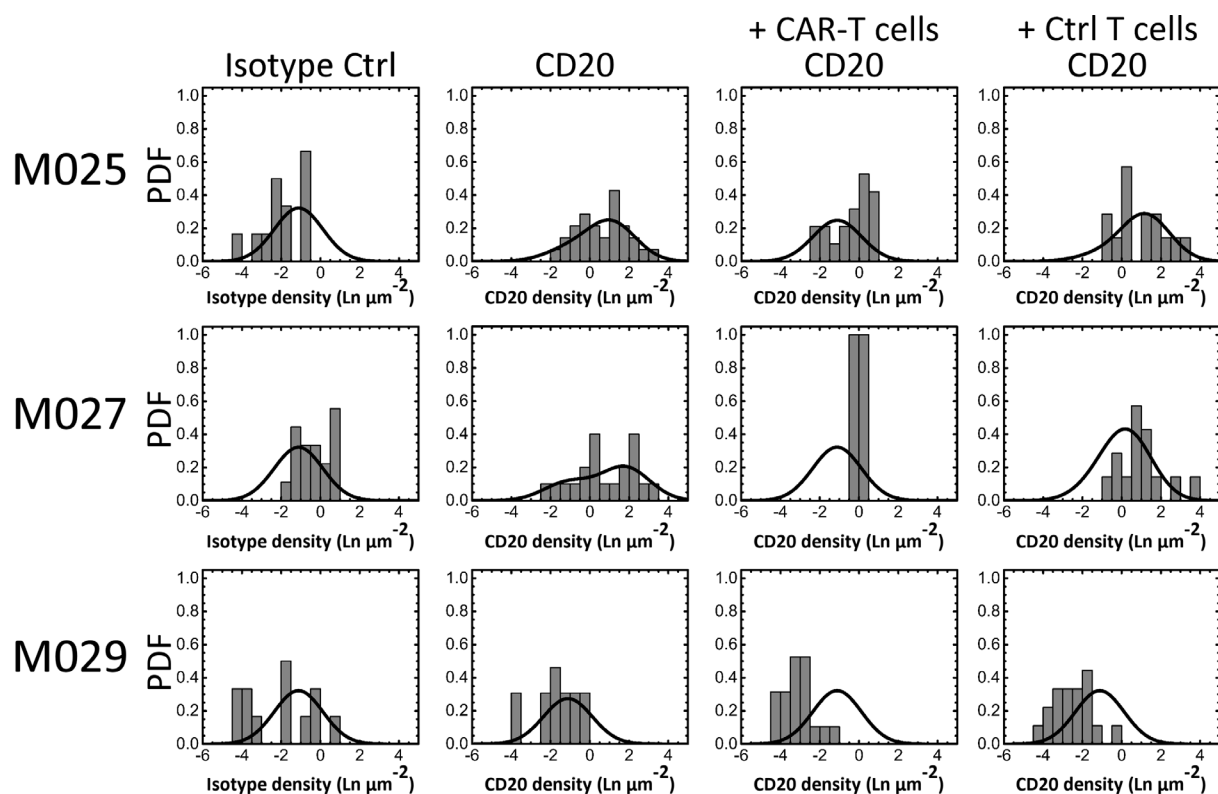

**Supplementary Figure 8. Quantification of CD20 on myeloma cells by *d*STORM and elimination of CD20-positive myeloma cells by CD20 CAR-T.** CD138-purified bone marrow aspirates from 3 multiple myeloma patients were stained with antibodies against CD138 and CD38 to detect myeloma cells and a CD20-specific antibody or corresponding isotype control as indicated. Left panels: Logarithmic number (natural logarithm, Ln) of isotype and CD20 antibodies per  $\mu\text{m}^2$  of untreated myeloma cells. Right panels: Logarithmic CD20 densities of control T-cell- and CAR-T-cell-treated myeloma cells. Density distributions were subsequently divided into a CD20-positive subpopulation (CD20-positive cells) and a CD20-negative subpopulation (CD20-negative cells). The latter group was defined by the density distribution pattern of the isotype control antibody (non-specific binding of the control antibody to the plasma membrane and glass surface). Distributions were fitted with a one or two component log-normal function. PDF: probability density function. Data are also summarized in Supplementary Table 3.

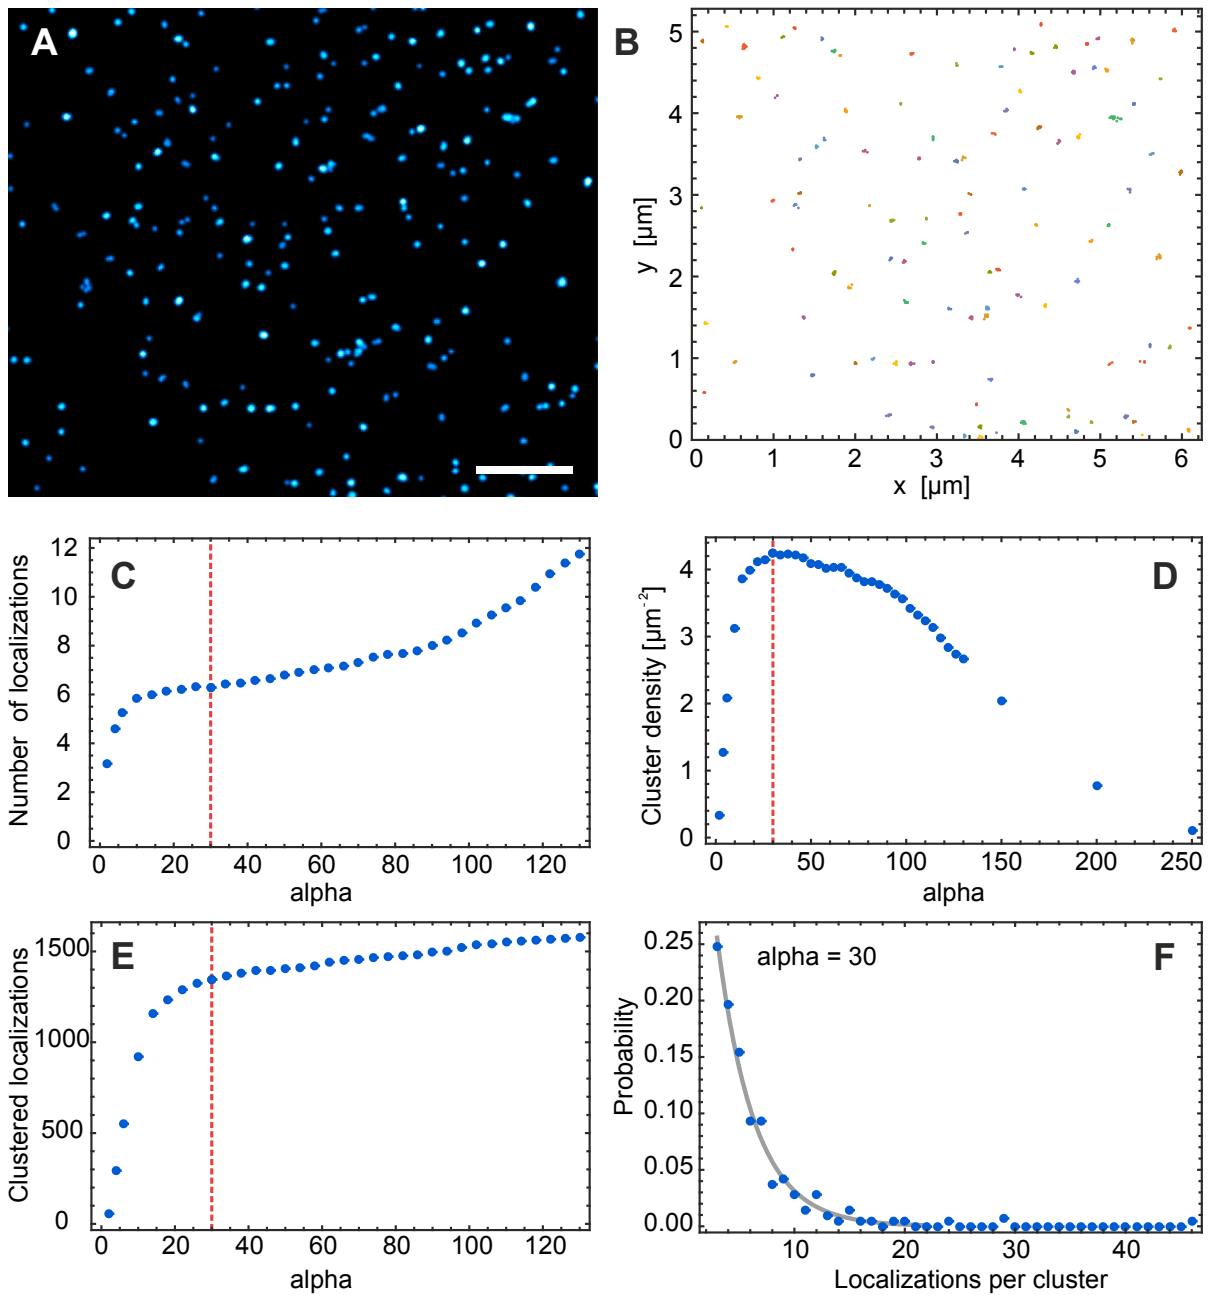

**Supplementary Figure 9.** Clustering CD19 molecules on myeloma cells using alpha shapes. **(A)** Section of a reconstructed *d*STORM image of CD19 molecules stained with anti-human CD19 Alexa Fluor 647 antibody. **(B)** Correspondent alpha shape diagram illustrating the obtained clusters in different colors. Repeated localizations coming from single fluorescent spots were clustered with alpha shapes and an alpha value of 30 nm. **(C–E)** A suitable alpha value was determined by serial cluster finding, i.e. varying  $\alpha$  from small to large values which influences the number of localizations per cluster **(C)**, cluster density **(D)** and the number of clustered localizations **(E)** (non-clustered localizations were discarded). Red dotted lines mark positions at  $\alpha = 30$  nm. **(F)** Relative distribution of the number of localizations per cluster for  $\alpha = 30$  nm (mean  $\approx 6.3$  localizations per cluster). Scale bar, 1  $\mu\text{m}$ .

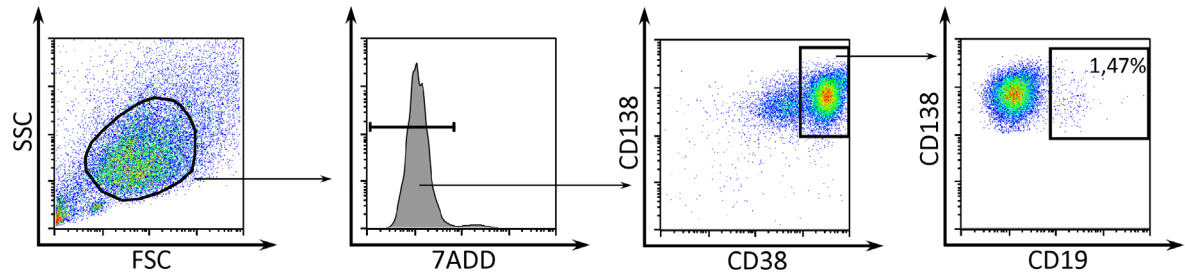

**Supplementary Figure 10.** Gating strategy used in FC experiments. Flow cytometric analysis of CD19-expression on primary myeloma cells as depicted in **Figure 1**. Purified bone marrow aspirates were analyzed and a plasma cell gate was set (FSC/SSC) -> viable cells (7-AAD<sup>-</sup>)-> Multiple Myeloma cells (CD138<sup>+</sup>/CD38<sup>+</sup>). Expression of CD20 was similarly analyzed (**Figure 4**)

**Supplementary Table 1: Patient characteristics**

| <b>Characteristic</b>                        | <b>all patients (n=14)</b> |
|----------------------------------------------|----------------------------|
| Median age (range) - yr                      | 62.3 (52 – 81)             |
| Male - no. (%)                               | 7 (50)                     |
| Salmon & Durie* stage at diagnosis - no. (%) |                            |
| I                                            | 3 (21)                     |
| II                                           | 1 (7)                      |
| IIIA                                         | 8 (57)                     |
| IIIB                                         | 2 (14)                     |
| Myeloma subtype - no. (%)                    |                            |
| IgG                                          | 8 (57)                     |
| IgA                                          | 1 (7)                      |
| IgD                                          | 1 (7)                      |
| Light chain                                  | 4 (29)                     |
| Cytogenetic profile** - no. (%)              |                            |
| High-risk                                    | 5 (36)                     |
| Standard risk                                | 9 (64)                     |
| Time from diagnosis (range) - months         | 16 (0 – 69)                |
| Remission state*** - no. (%)                 |                            |
| Primary diagnosis                            | 4 (29)                     |
| Very good partial response                   | 2 (14)                     |
| Progressive disease                          | 8 (57)                     |
| Bone marrow infiltration - % (range)         | 25 (10 – 99)               |
| Previous therapy regimens                    |                            |
| Median no. (range)                           | 1 (0 – 3)                  |
| Previous therapies - no. (%)                 |                            |
| Hematopoietic stem-cell                      | 9 (64)                     |
| Lenalidomide                                 | 6 (43)                     |
| Proteasome inhibitor                         | 10 (71)                    |

\* A clinical staging system for multiple myeloma based on the correlation of the measured myeloma cell mass with presenting clinical features, response to treatment, and survival<sup>1</sup>.

\*\* Cytogenetic analysis: a high-risk cytogenetic profile refers to adverse FISH including IgH translocations (t(4;14) or t(14;16) or t(14;20)), 17p13 del and/or 1q21 gain<sup>2</sup>.

\*\*\* International Myeloma Working Group consensus criteria for response and minimal residual disease assessment in multiple myeloma<sup>3</sup>.

**Supplementary Table 2: Antibody titration on NALM-6 cells**

| Antibody             | Molecules per cell |               |
|----------------------|--------------------|---------------|
|                      | Anti-CD19          | Isotype       |
| 10 $\mu\text{g/ml}$  | 1880 $\pm$ 220     | 72 $\pm$ 20   |
| 5 $\mu\text{g/ml}$   | 1860 $\pm$ 180     | 85 $\pm$ 25   |
| 2.5 $\mu\text{g/ml}$ | 1780 $\pm$ 210     | 50 $\pm$ 30   |
| 500 ng/ml            | 710 $\pm$ 110      | 44 $\pm$ 28   |
| 50 ng/ml             | 182 $\pm$ 29       | 7.1 $\pm$ 6.4 |
| 5 ng/ml              | 67 $\pm$ 10        | 1.3 $\pm$ 1.4 |
| 500 pg/ml            | 12.0 $\pm$ 2.9     | 0.8 $\pm$ 0.6 |
| 50 pg/ml             | 3.1 $\pm$ 1.3      | 0 $\pm$ 0     |
| 0                    | 0 $\pm$ 0          | 0 $\pm$ 0     |

$\pm$ : SEM (standard error of the Mean)

**Supplementary Table 3 – Summary of data obtained by *d*STORM and flow cytometry**

| #  | ID   | Flow Cytometry<br>$\Delta\%$ CD20 <sup>+</sup><br>(% anti-CD20 -<br>% isotype) | <i>d</i> STORM<br>% CD20 <sup>+</sup> | CD20<br>molecules/cell*<br>(range) | Elimination by CD20 CAR-T |
|----|------|--------------------------------------------------------------------------------|---------------------------------------|------------------------------------|---------------------------|
| 15 | M025 | 33<br>(35.7 – 2.7)                                                             | 76.7                                  | 650<br>(55 – 7,724)                | +                         |
| 17 | M027 | 16.8<br>(17.9 – 1.1)                                                           | 64.7                                  | 1,770<br>(149 – 21,045)            | +                         |
| 18 | M029 | 0<br>(0.42 – 0.44)                                                             | 0                                     | 0                                  | 0                         |

(\*) Mean, in brackets: Calculated data ranging from small ( $\exp(\mu-2\sigma)$ ) to high ( $\exp(\mu+2\sigma)$ ) values (95.45% of all values lie within this range).

$\Delta\%$  CD20<sup>+</sup>: the percentage of the cells in the CD20-positive gate for the isotype control was subtracted from the percentage of cells in the CD20-positive gate for the respective CD20 staining.

## References

1. Durie, B.G. & Salmon, S.E. A clinical staging system for multiple myeloma. Correlation of measured myeloma cell mass with presenting clinical features, response to treatment, and survival. *Cancer* **36**, 842-854 (1975).
2. Chng, W.J., *et al.* IMWG consensus on risk stratification in multiple myeloma. *Leukemia* **28**, 269-277 (2014).
3. Kumar, S., *et al.* International Myeloma Working Group consensus criteria for response and minimal residual disease assessment in multiple myeloma. *Lancet Oncol* **17**, e328-e346 (2016).
